# Supplementary material for: Aggravated Gut Microbiota and Metabolomic Imbalances Are Associated with Hypertension Patients Comorbid with Atrial Fibrillation
Source: MDPI journal article supplement (doi:10.3390/biom12101445), 2022-10-09
Supplement: s1 [file s1]

**Table S1**

Results of Multivariate Analysis by Linear Models.

| Variables                     | Coefficient | Correlation direction | P value |
|-------------------------------|-------------|-----------------------|---------|
| <i>g_Eubacterium</i>          | 0.068       | Positive              | <0.001  |
| <i>g_Blautia</i>              | 0.068       | Positive              | <0.001  |
| <i>g_Ruminococcus</i>         | 0.041       | Positive              | 0.018   |
| <i>g_Dorea</i>                | 0.039       | Positive              | <0.001  |
| <i>g_Bifidobacterium</i>      | 0.034       | Positive              | 0.045   |
| <i>g_Fusicatenibacter</i>     | 0.030       | Positive              | <0.001  |
| <i>g_Anaerostipes</i>         | 0.023       | Positive              | <0.001  |
| <i>g_Streptococcus</i>        | 0.021       | Positive              | <0.001  |
| <i>g_Lachnospira</i>          | 0.017       | Positive              | <0.001  |
| <i>g_Coproccoccus</i>         | 0.014       | Positive              | 0.008   |
| <i>g_Coprobacillus</i>        | 0.014       | Positive              | <0.001  |
| <i>g_Veillonella</i>          | 0.013       | Positive              | 0.002   |
| <i>g_Romboutsia</i>           | 0.013       | Positive              | 0.001   |
| <i>g_Dialister</i>            | 0.011       | Positive              | 0.200   |
| <i>g_Tyzzerella</i>           | 0.009       | Positive              | <0.001  |
| <i>g_Intestinibacter</i>      | 0.009       | Positive              | <0.001  |
| <i>g_Enterococcus</i>         | 0.007       | Positive              | <0.001  |
| <i>g_Lactobacillus</i>        | 0.007       | Positive              | <0.001  |
| <i>g_Eggerthella</i>          | 0.006       | Positive              | 0.022   |
| <i>g_Clostridioides</i>       | 0.006       | Positive              | 0.006   |
| <i>g_Klebsiella</i>           | 0.005       | Positive              | 0.433   |
| <i>g_Butyrvibrio</i>          | 0.005       | Positive              | 0.020   |
| <i>g_Holdemanella</i>         | 0.005       | Positive              | <0.001  |
| <i>g_Shigella</i>             | 0.004       | Positive              | 0.036   |
| <i>g_Citrobacter</i>          | 0.003       | Positive              | 0.020   |
| <i>g_Mycoplasma</i>           | 0.002       | Positive              | 0.006   |
| <i>g_Turicibacter</i>         | 0.002       | Positive              | 0.008   |
| <i>g_Mitsuokella</i>          | 0.002       | Positive              | <0.001  |
| <i>g_Azospirillum</i>         | -0.001      | Negative              | 0.063   |
| <i>g_Pseudoflavonifractor</i> | -0.005      | Negative              | 0.001   |
| <i>g_Paraprevotella</i>       | -0.005      | Negative              | 0.028   |
| <i>g_Ornithobacterium</i>     | -0.006      | Negative              | <0.001  |
| <i>g_Intestinimonas</i>       | -0.007      | Negative              | 0.023   |
| <i>g_Parasutterella</i>       | -0.012      | Negative              | 0.005   |
| <i>g_Flavonifractor</i>       | -0.014      | Negative              | 0.006   |
| <i>g_Sutterella</i>           | -0.014      | Negative              | 0.181   |
| <i>g_Bilophila</i>            | -0.015      | Negative              | 0.067   |
| <i>g_Butyricoccus</i>         | -0.017      | Negative              | <0.001  |
| <i>g_Oscillibacter</i>        | -0.052      | Negative              | 0.005   |
| <i>g_Prevotella</i>           | -0.142      | Negative              | 0.025   |

Confounders: age, diabetes mellitus (DM), total cholesterol (TC) and male gender.

**Table S2**

Results of the linear model with covariate adjustment.

| Variables                | $\beta$ | <i>P</i> value |
|--------------------------|---------|----------------|
| Palmitic acid            | 17.05   | <0.001         |
| Tetracosahexaenoic acid  | 10.78   | <0.001         |
| Linoleic acid            | 8.75    | <0.001         |
| Arachidonic acid         | 7.31    | <0.001         |
| Oleic acid               | 3.25    | <0.001         |
| Stearic acid             | 3.05    | <0.001         |
| $\alpha$ -Linolenic acid | 1.21    | <0.001         |
| cis-gondoic acid         | 0.59    | <0.001         |
| Adrenic acid             | -4.66   | 0.134          |

Covariate: age, diabetes mellitus (DM), total cholesterol (TC) and male gender.

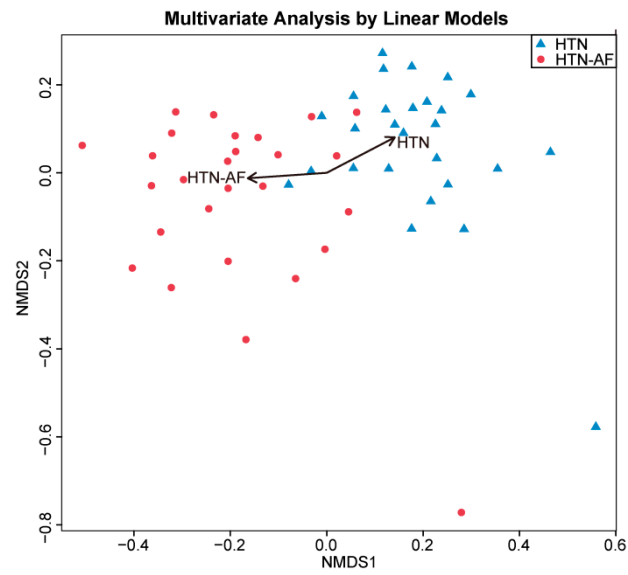

**Figure S1.** Multivariate Analysis by Linear Models (MaAsLin) adjusted for potential confounders (total cholesterol, gender, diabetes mellitus, and age) showed remarkable differences in GM between the two groups.

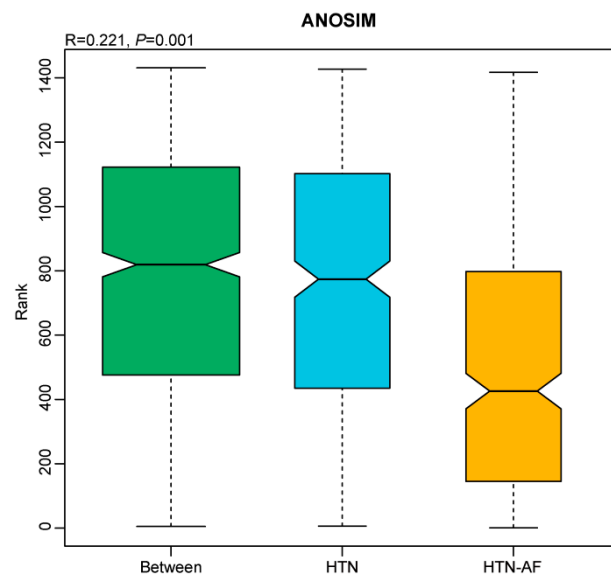

**Figure S2.** Anosim analysis of KEGG orthology between the HTN and HTN-AF groups.
